# Supplementary material
Source: Springer Nature journal article supplement (https://www.springermedizin.de/resource/supplementary/12885_2009_1959_MOESM4_ESM.pdf/9460186)

-233

+150

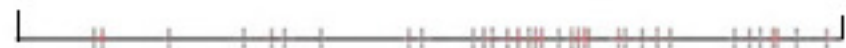

HT-29

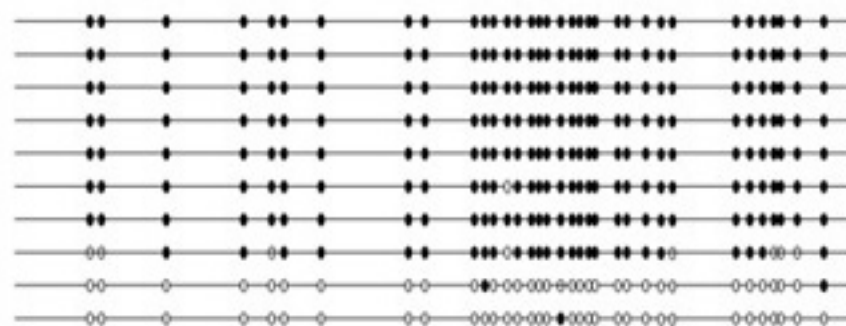

SW480

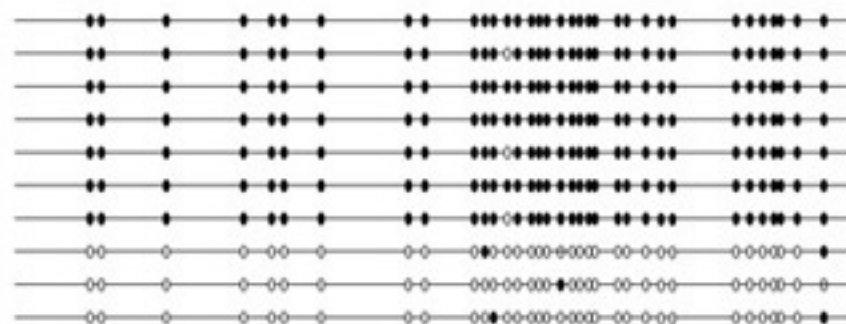

T38

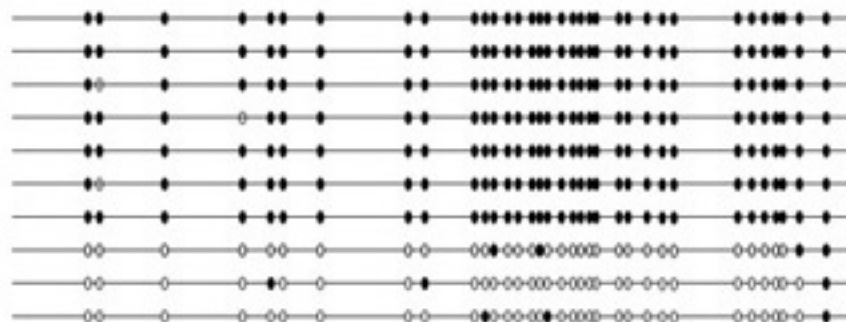

N38

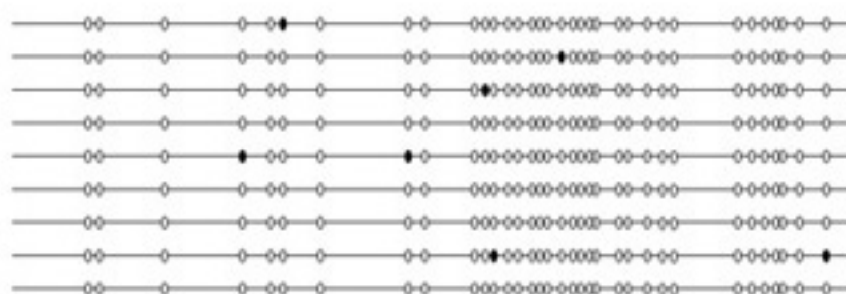

Supplement: MOESM4 [file 9460186]
